# Supplementary material for: Surgical treatment for severe cubital tunnel syndrome with absent sensory nerve conduction
Source: PubMed Central journal article supplement — Neural Regen Res. 2019 Mar;14(3):519–24. doi: 10.4103/1673-5374.245479 (PMC6334593; doi:10.4103/1673-5374.245479), 2019-03
Supplement: NRR-14-519_Suppl1.pdf [file NRR-14-519_Suppl1.pdf]

## OPEN PEER REVIEW REPORT 1

**Reviewer 1:** Mohammad Reza Farahpour, Islamic Azad University Urmia Branch, Clinical Science, Urmia, IRAN (Islamic Republic Of).

**Comments to the authors:**

Dear Authors

- 1- Your article need to native English language edition.
- 2- Key word should be written more briefly.
- 3- All mentioned reference in article, should be cited in end of same sentences or paragraph. For example, Taha et al. (2004) and Matsuzaki et al. (2004) in section 'Introduction'.
- 4- In section 'Result' line 3: what is  $P=.86$ ,  $P=.71$ ,  $P=.01$  and ... ? I think should be change to  $P=0.86$  and ... respectively.
- 5- reference number 15 ( Practice parameter for electrodiagnostic studies in ulnar neuropathy at the elbow: .. Muscle & nerve 1999;22:408-411. ) don't cited in text.
